# Supplementary material for: Selective decolorization of cationic dyes by peroxymonosulfate: non-radical mechanism and effect of chloride
Source: Royal Society of Chemistry journal article supplement (doi:10.1039/c5ra19718j), 2015-12-22
Supplement: c5ra19718j1.pdf [file c5ra19718j1.pdf]

## Supplementary Material

### Selective decolorization of cationic dyes by peroxymonosulfate: non-radical mechanism and effect of chloride

Yang Lei <sup>a, b</sup>, Chuh-Shun Chen <sup>b</sup>, Jia Ai<sup>a</sup>, Heng Lin<sup>a</sup>, Yao-Hui Huang <sup>b, c\*</sup>, Hui Zhang

<sup>a\*</sup>

<sup>a</sup> Department of Environmental Engineering, Wuhan University, Wuhan.

<sup>b</sup> Department of Chemical Engineering, National Cheng Kung University, Tainan.

<sup>c</sup> Sustainable Environment Research Center, National Cheng Kung University, Tainan.

\*Corresponding author

Phone: 86-27-68775837;

Fax: 86-27-68778893;

E-mail: [eeng@whu.edu.cn](mailto:eeng@whu.edu.cn). (H. Zhang)

Phone: 886-2757575x62636;

Fax: 886-6-2344496;

E-mail: [yhhuang@mail.ncku.edu.tw](mailto:yhhuang@mail.ncku.edu.tw). (Y.H. Huang)

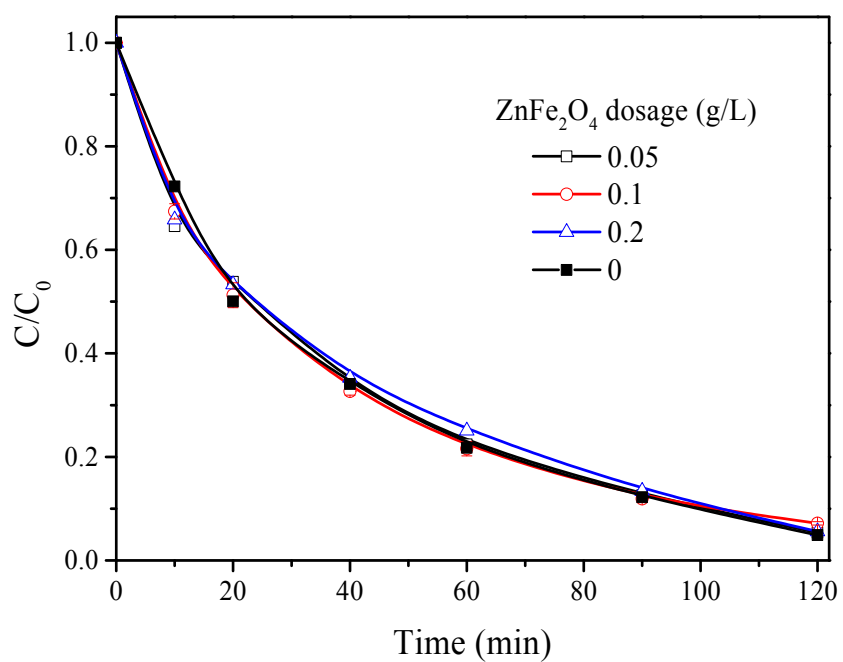

**Figure S1.** Influence of  $ZnFe_2O_4$  dosage on the degradation of RhB in PMS/ $ZnFe_2O_4$  system. Conditions:  $[PMS] = 2.5$  mM,  $[RhB] = 10$  mg/L,  $pH_0 = 4.5 \pm 0.1$ .

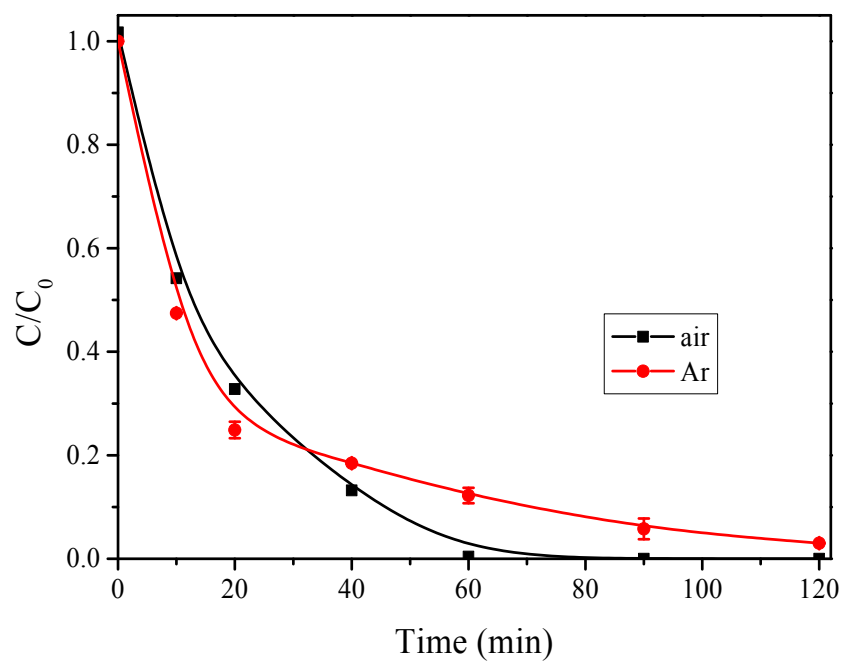

**Figure S2.** Influence of Ar purging on the degradation of RhB. Conditions: [PMS] = 2.5 mM,  $\text{pH}_0 = 4.5 \pm 0.1$ . [Ar] = 3 L/min, [RhB] = 10 mg/L.

**Table S1.** The final pH of RhB solution at different initial solution pH. Conditions: [PMS] = 2.5 mM, [RhB] = 10 mg/L, Time = 120 min.

| Initial pH       | 2.0  | 4.5  | 7.0  | 10.0 | 12.0  |
|------------------|------|------|------|------|-------|
| After adding PMS | 1.92 | 2.57 | 2.56 | 2.55 | 11.72 |
| Final pH         | 0.97 | 2.53 | 2.5  | 2.46 | 11.56 |
